# Supplementary material
Source: MDPI journal article supplement (https://www.mdpi.com/1996-1073/16/5/2300)

Figure S1: FTIR of raw Coffee Silverskin (CSS)

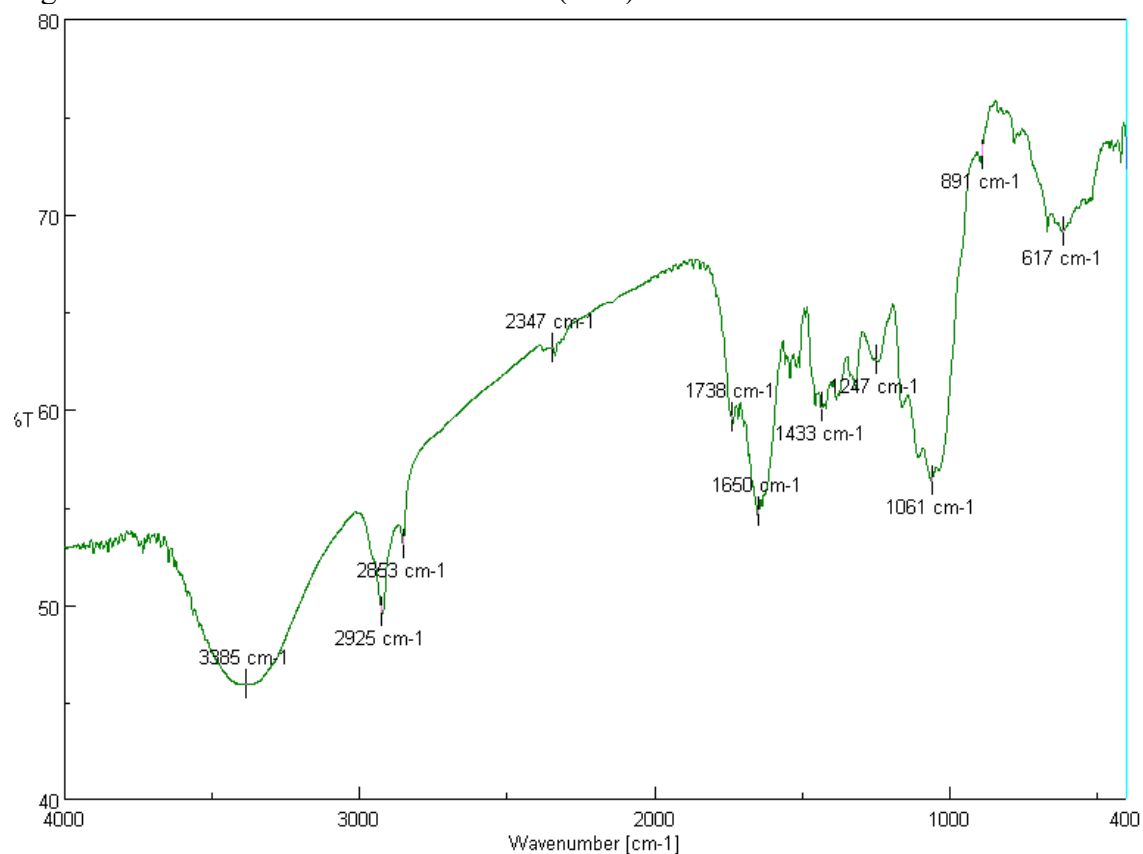

Figure S2: FTIR of raw Spent Coffee (SC)

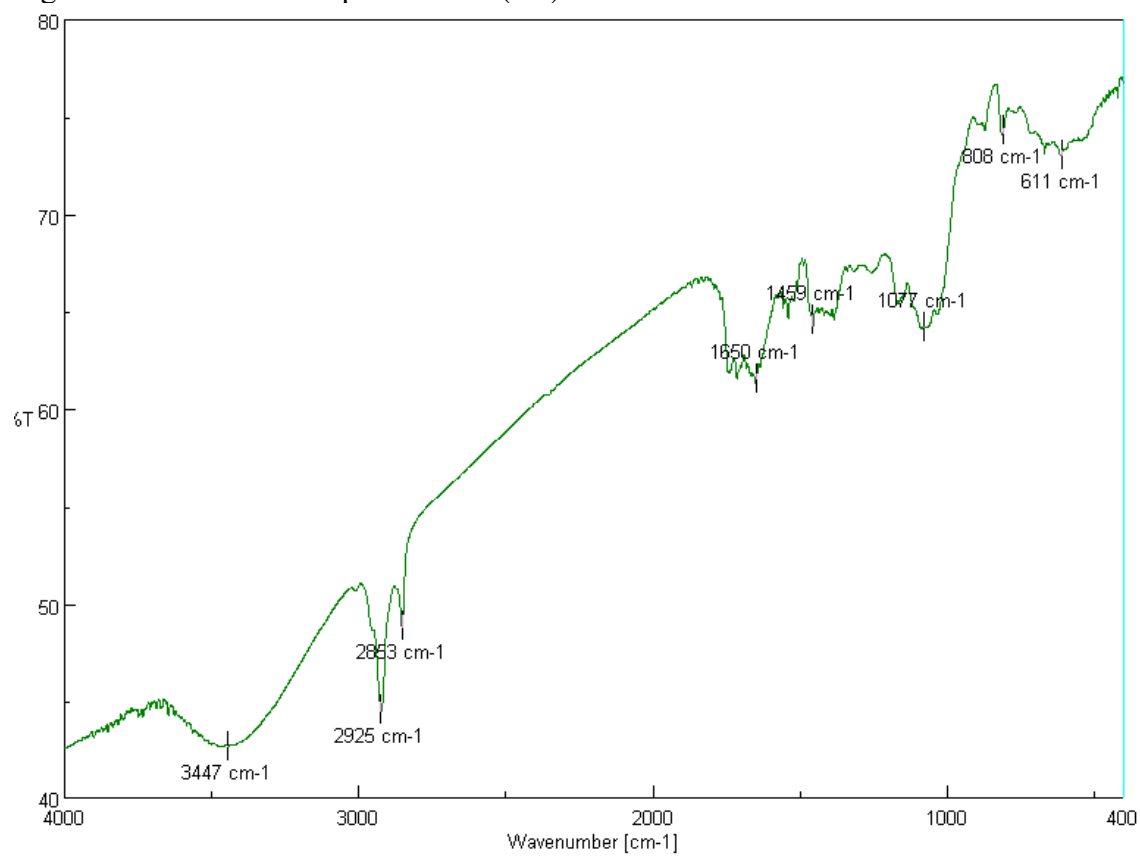

Figure S3: FTIR of Biochar CSS – 300 °C

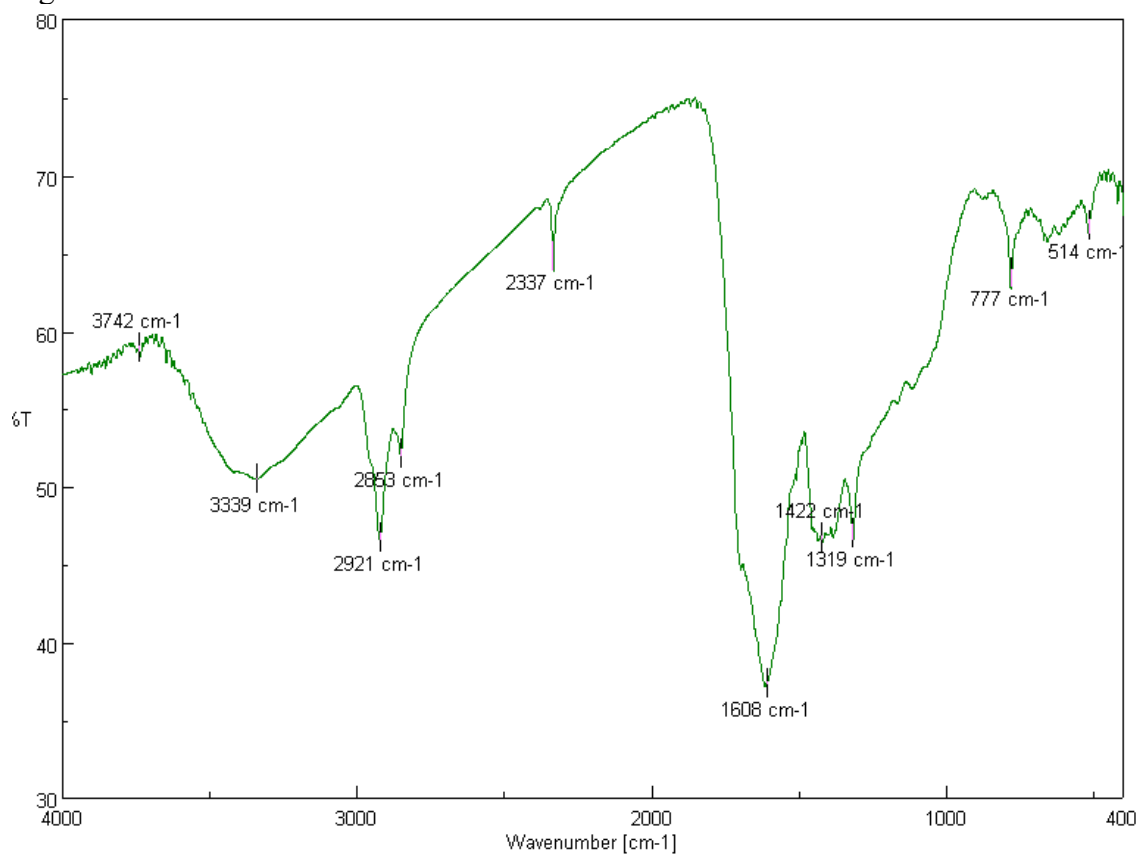

Figure S4: FTIR of Biochar CSS – 400 °C

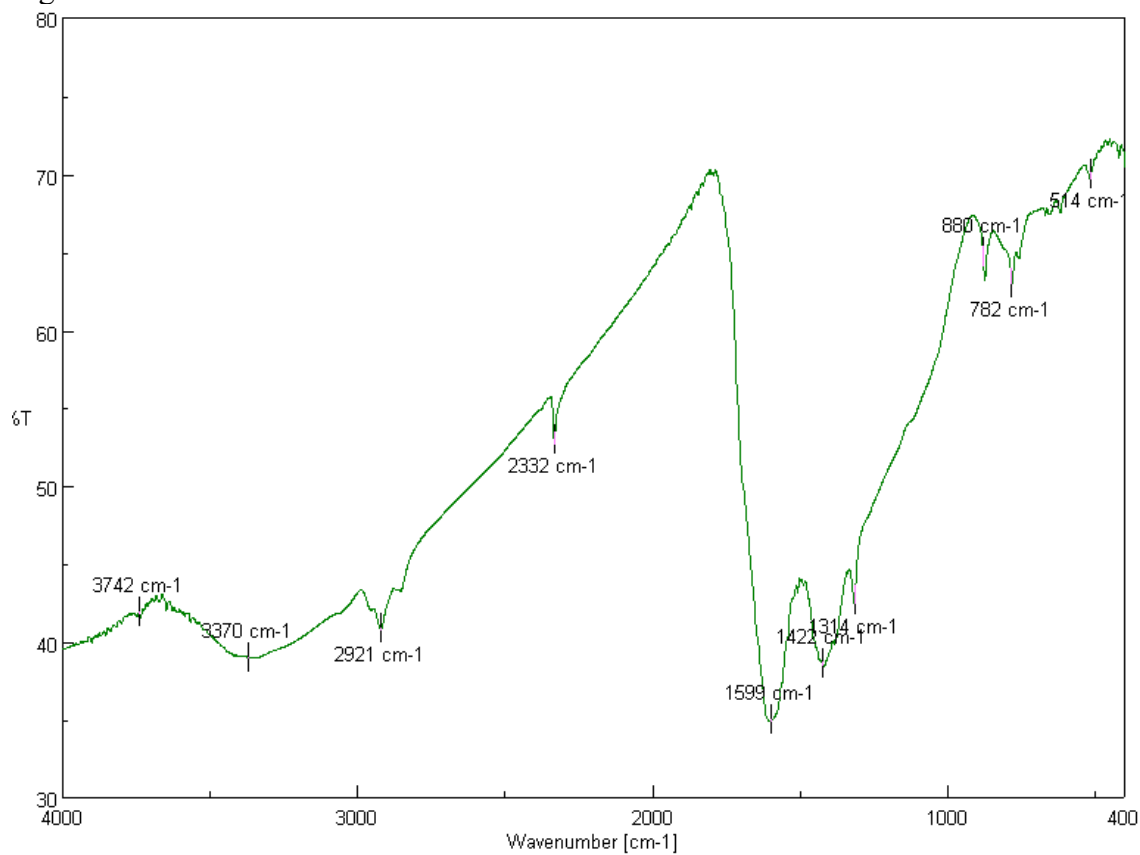

Figure S5: FTIR of Biochar CSS – 500 °C

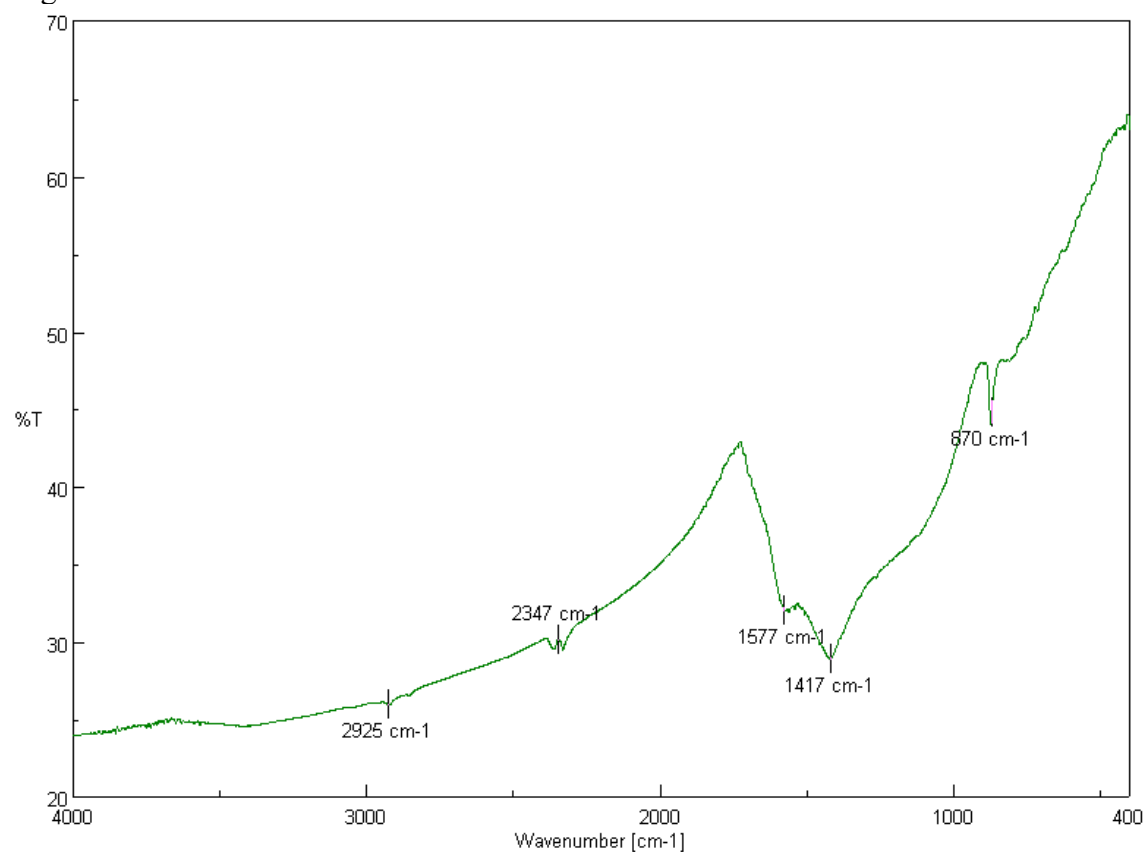

Figure S6: FTIR of Biochar CSS – 600 °C

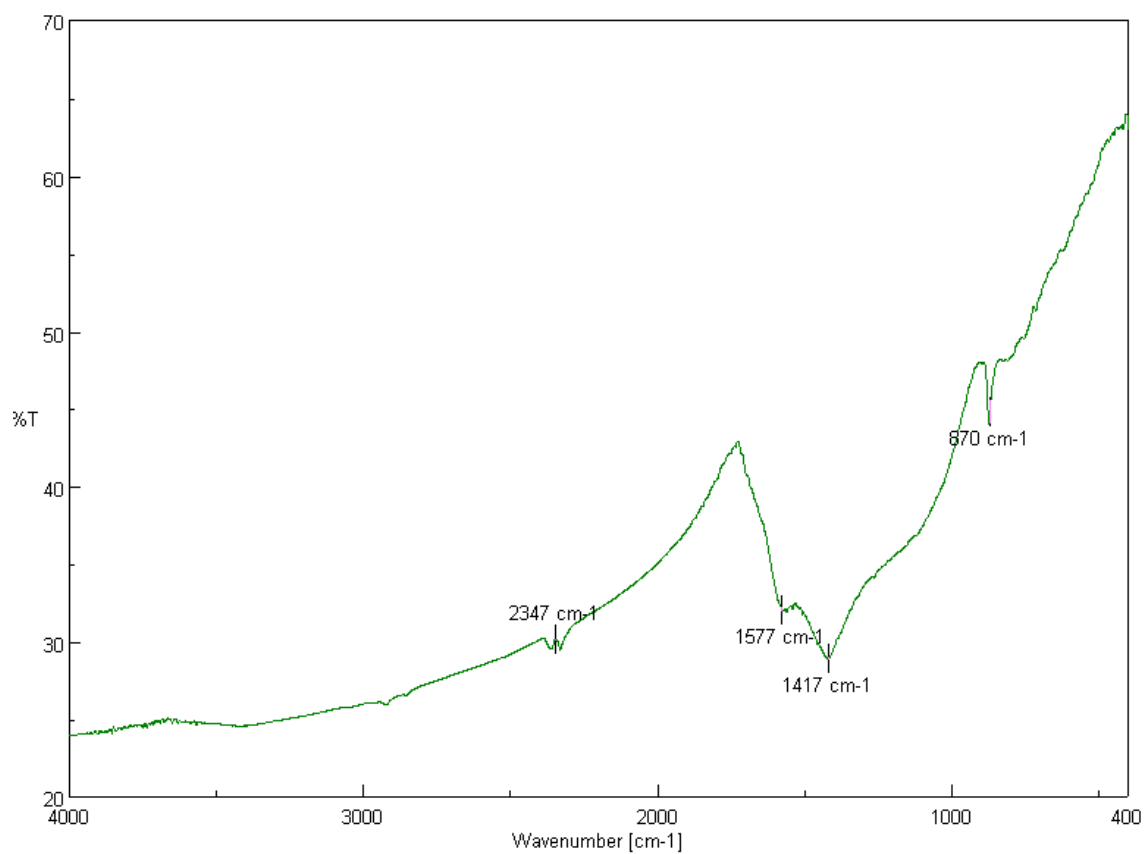

Figure S7: FTIR of Liquid fraction of CSS – 300 °C

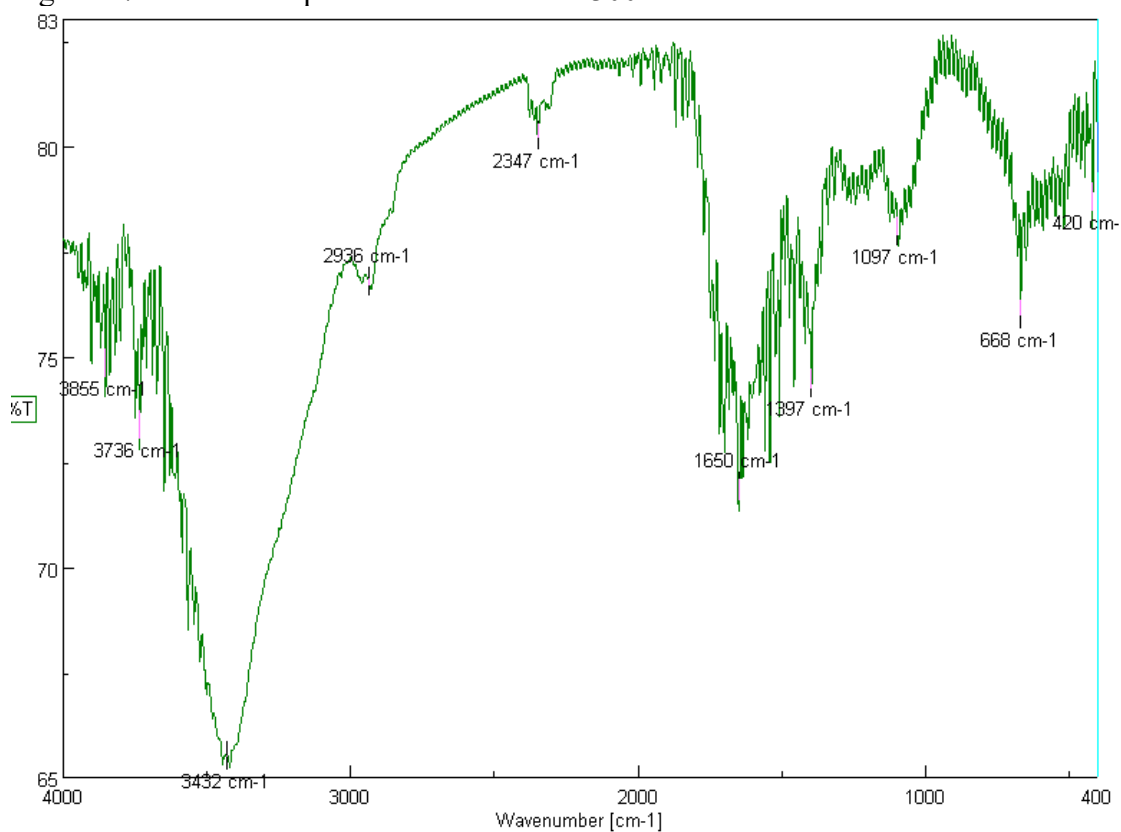

Figure S8: FTIR of Liquid fraction of CSS – 400 °C

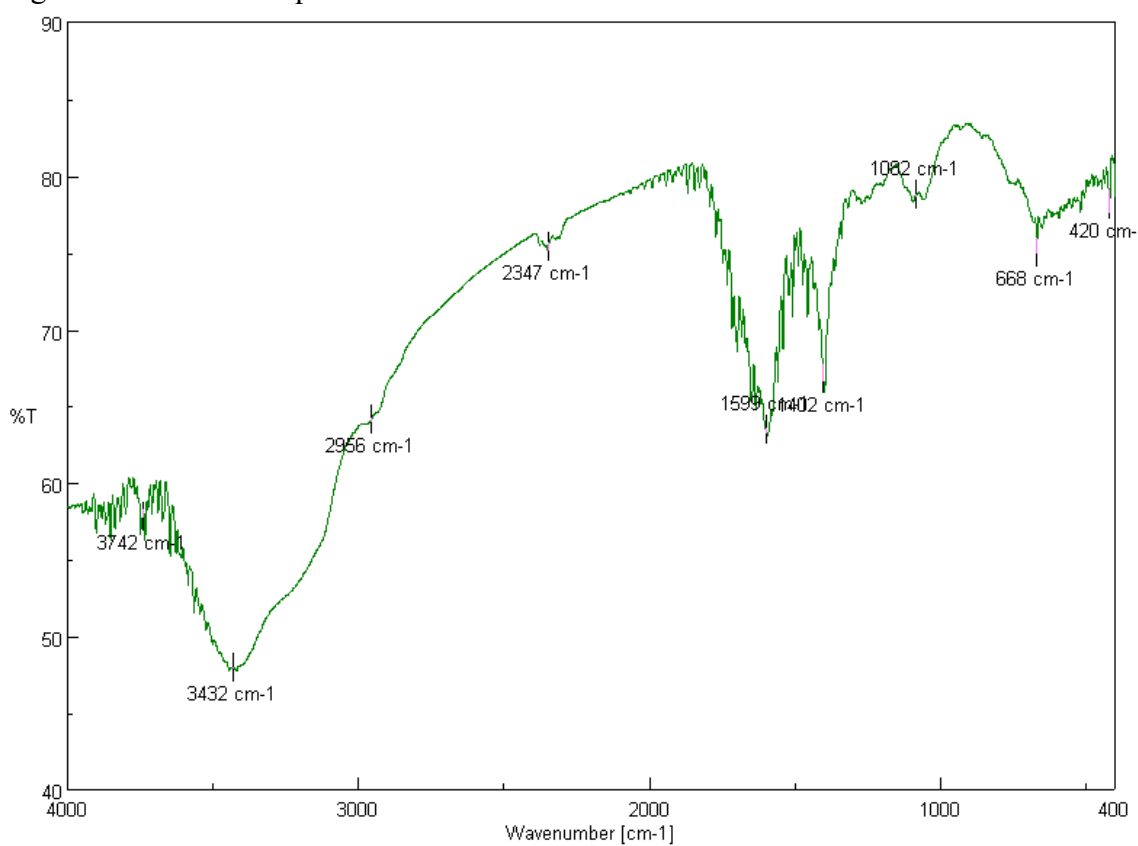

Figure S9: FTIR of Liquid fraction of CSS – 500 °C

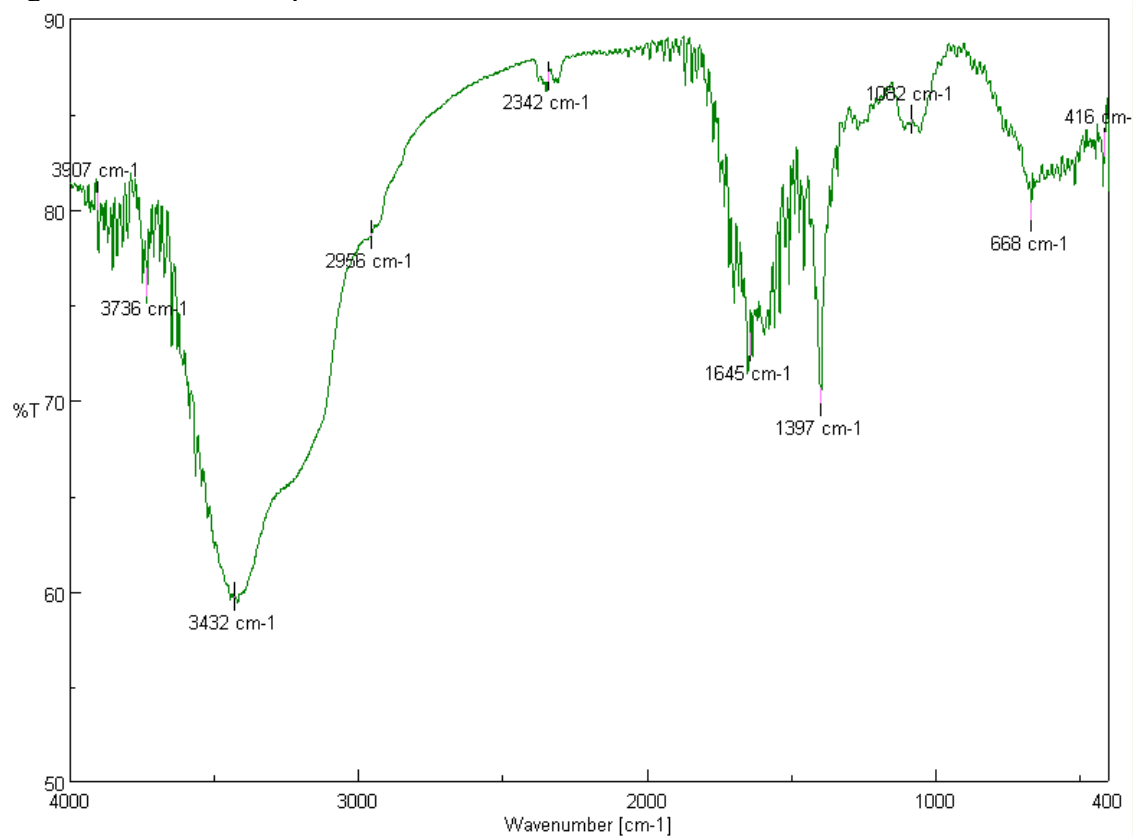

Figure S10: FTIR of Liquid fraction of CSS – 600 °C

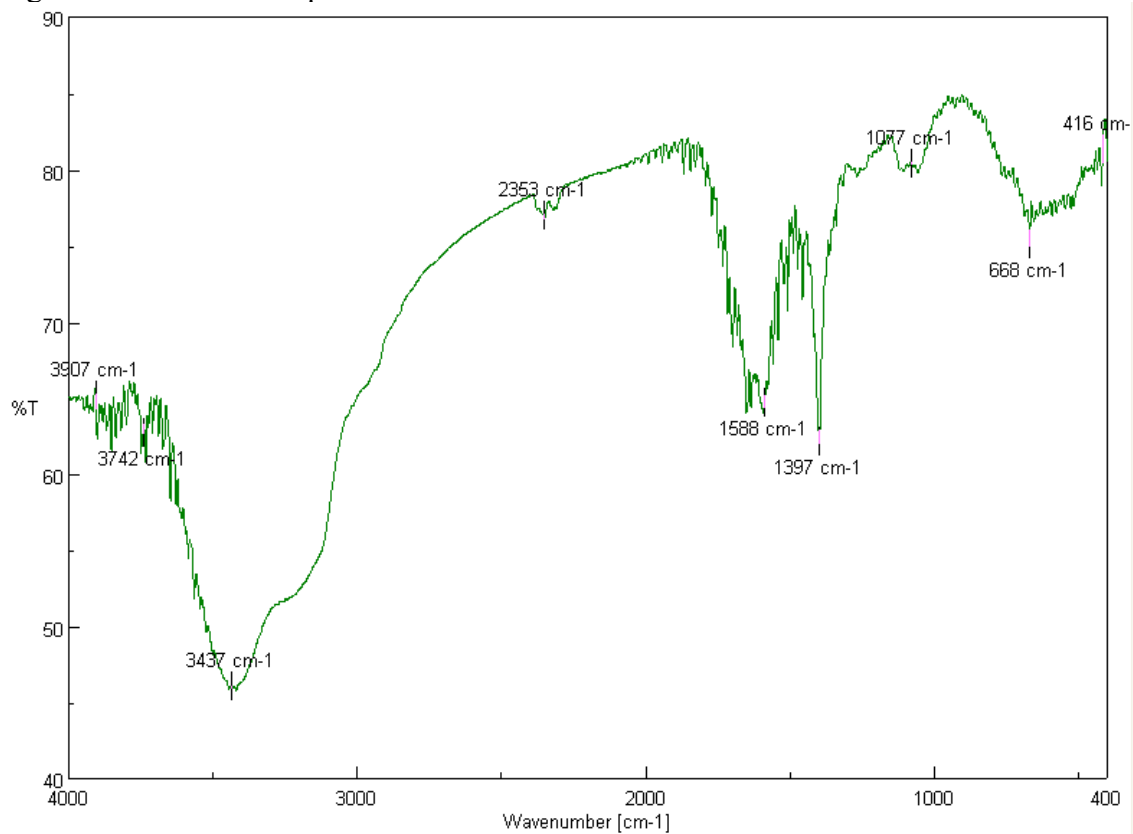

Figure S11: FTIR of Biochar SC – 300 °C

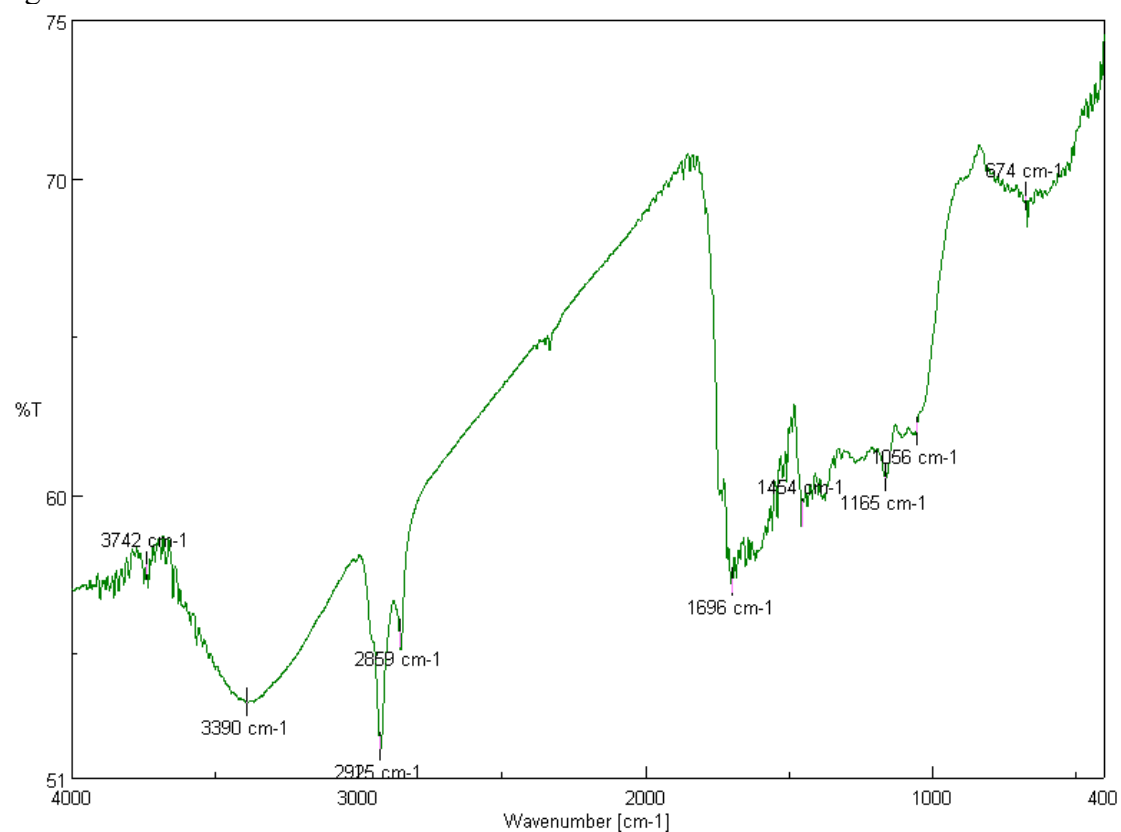

Figure S12: FTIR of Biochar SC – 400 °C

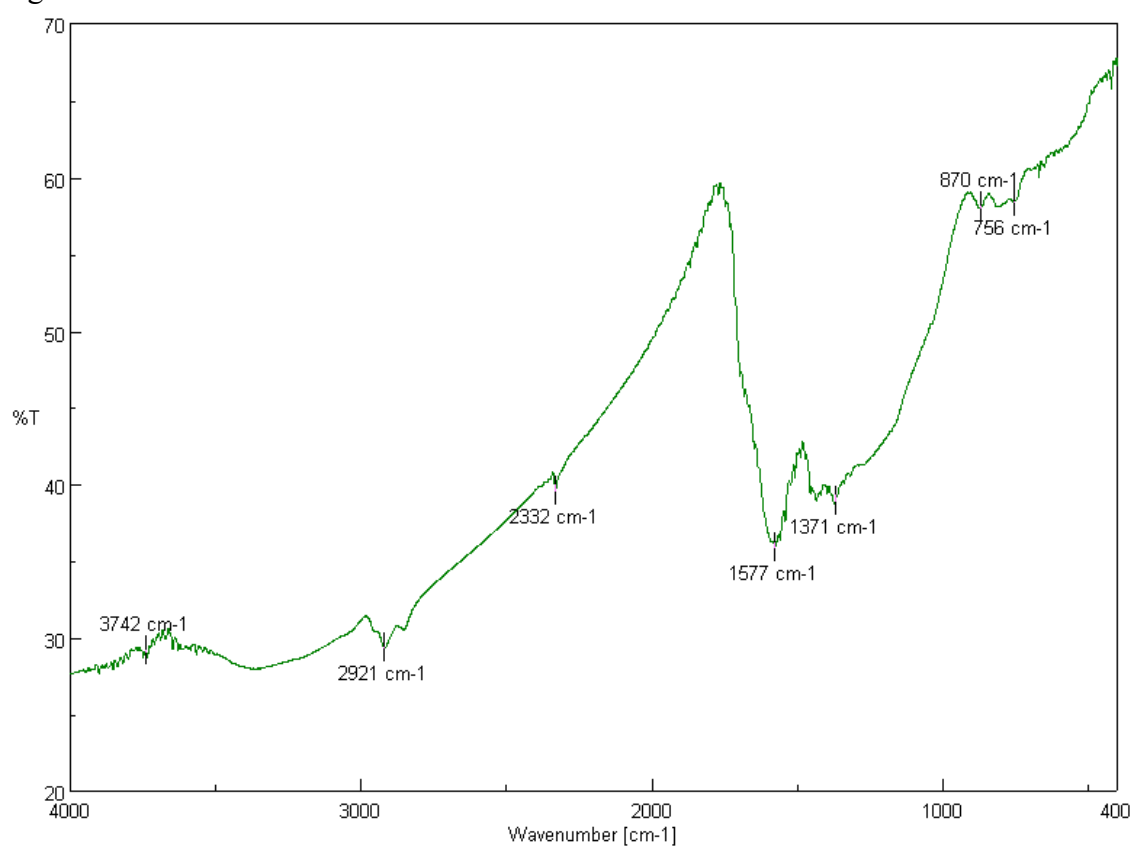

Figure S13: Biochar SC –500 °C

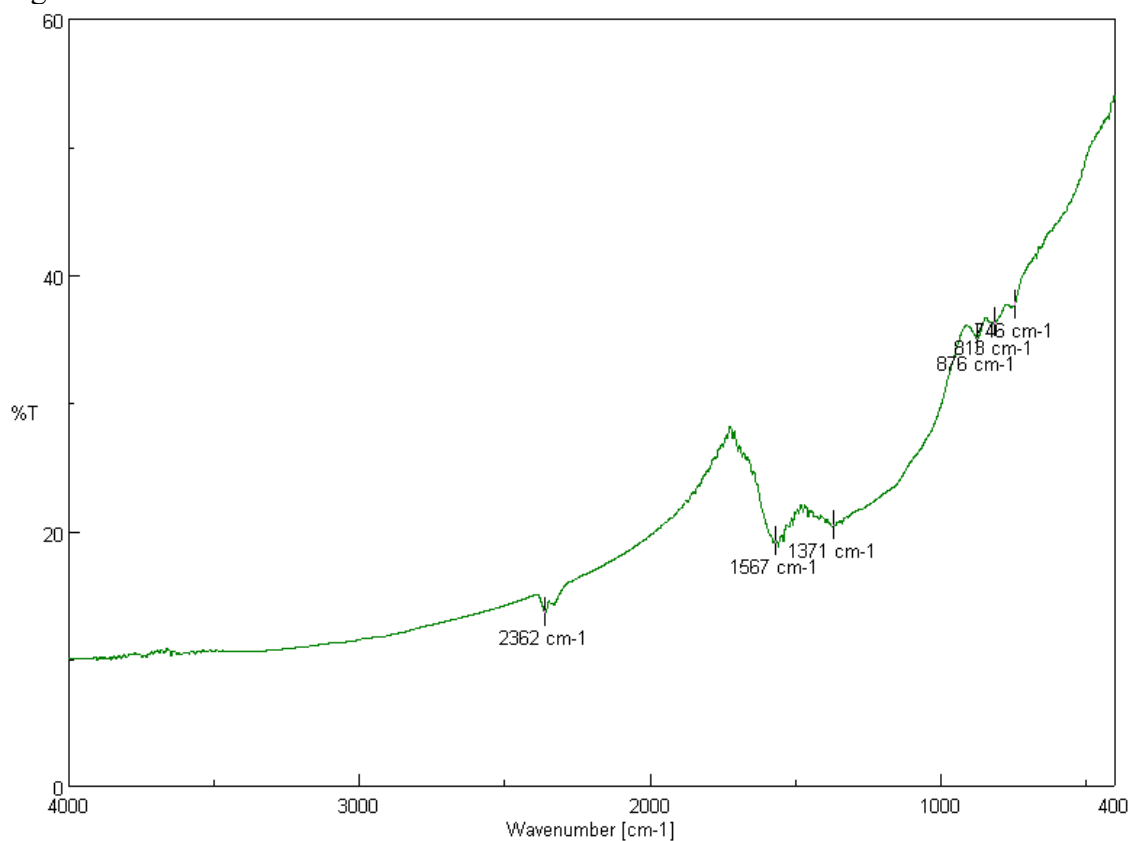

Figure S14: FTIR of Biochar SC – 600 °C

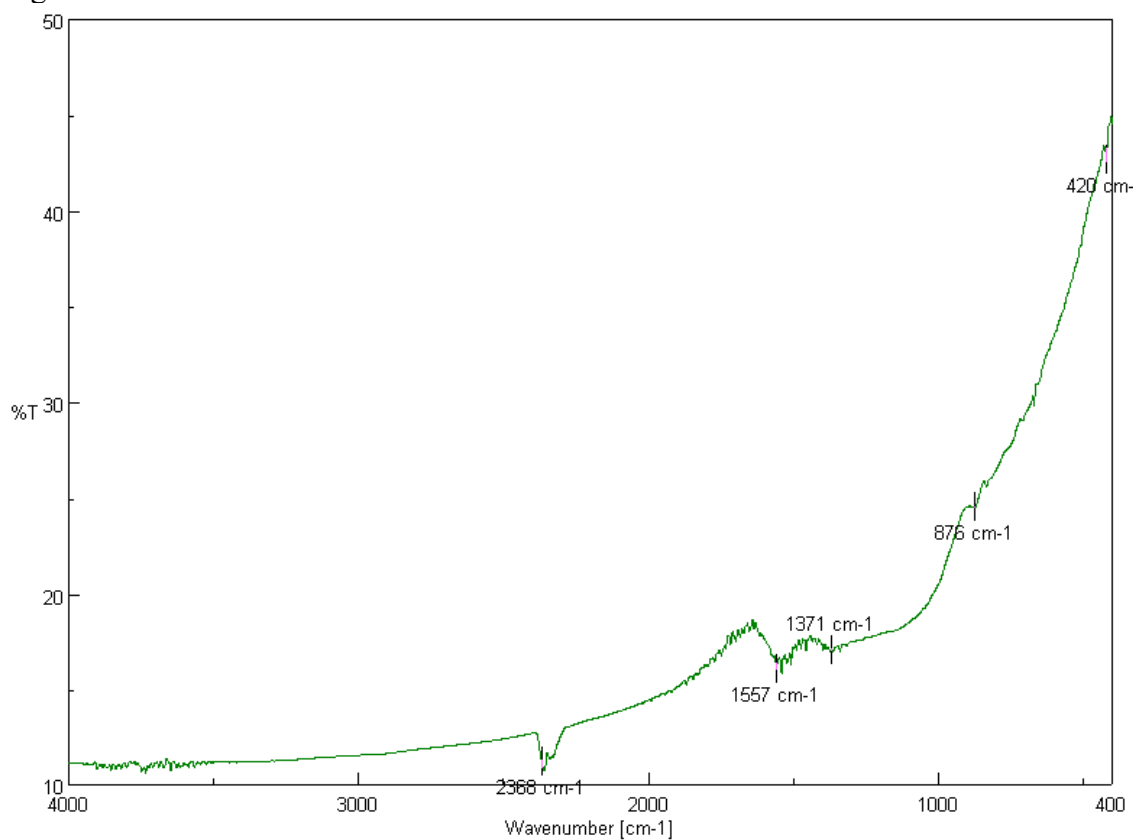

Figure S15: FTIR of Liquid fraction of SC – 300 °C

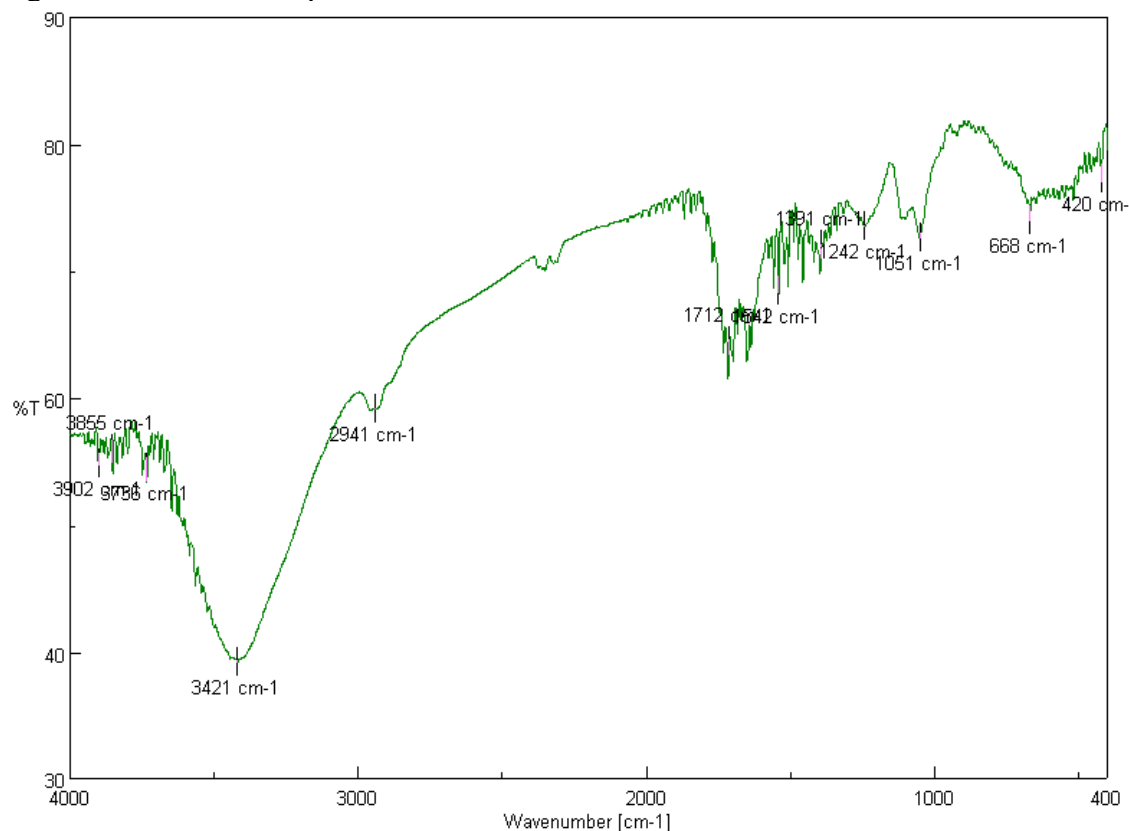

Figure S16: FTIR of Liquid fraction of SC – 400 °C

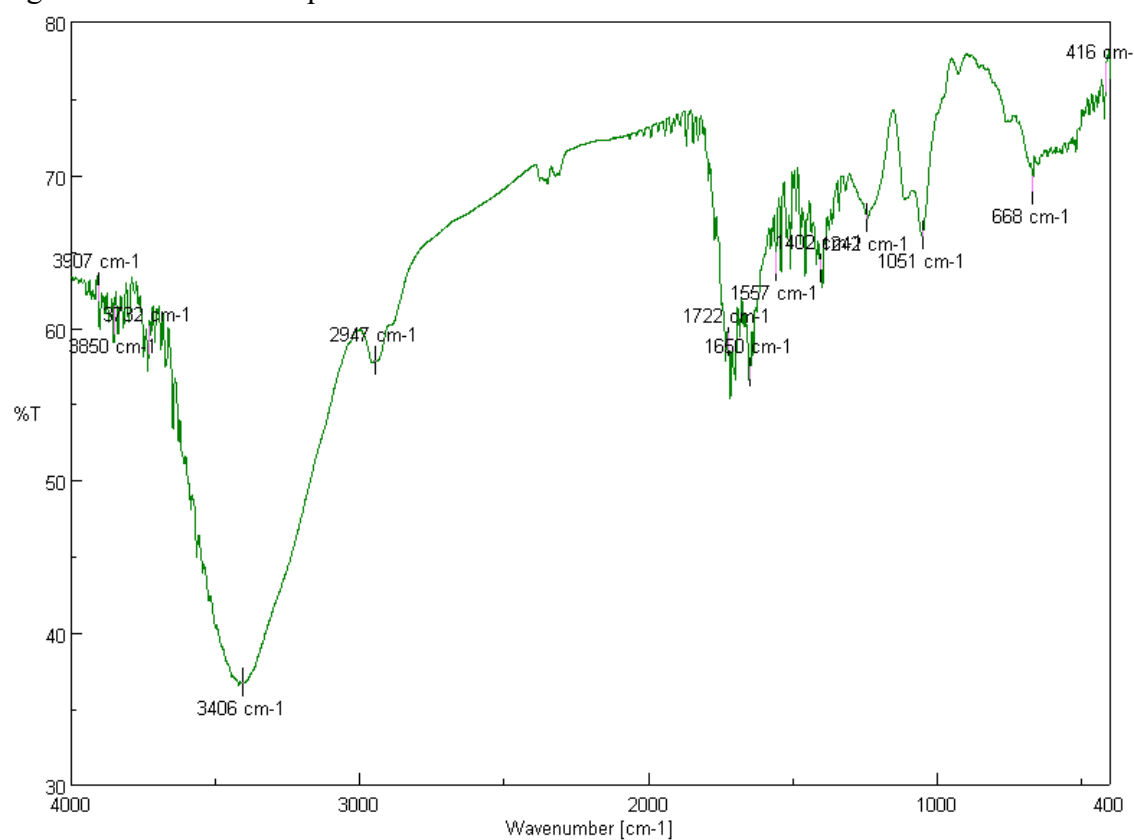



Figure S17: FTIR of Liquid fraction of SC – 500 °C

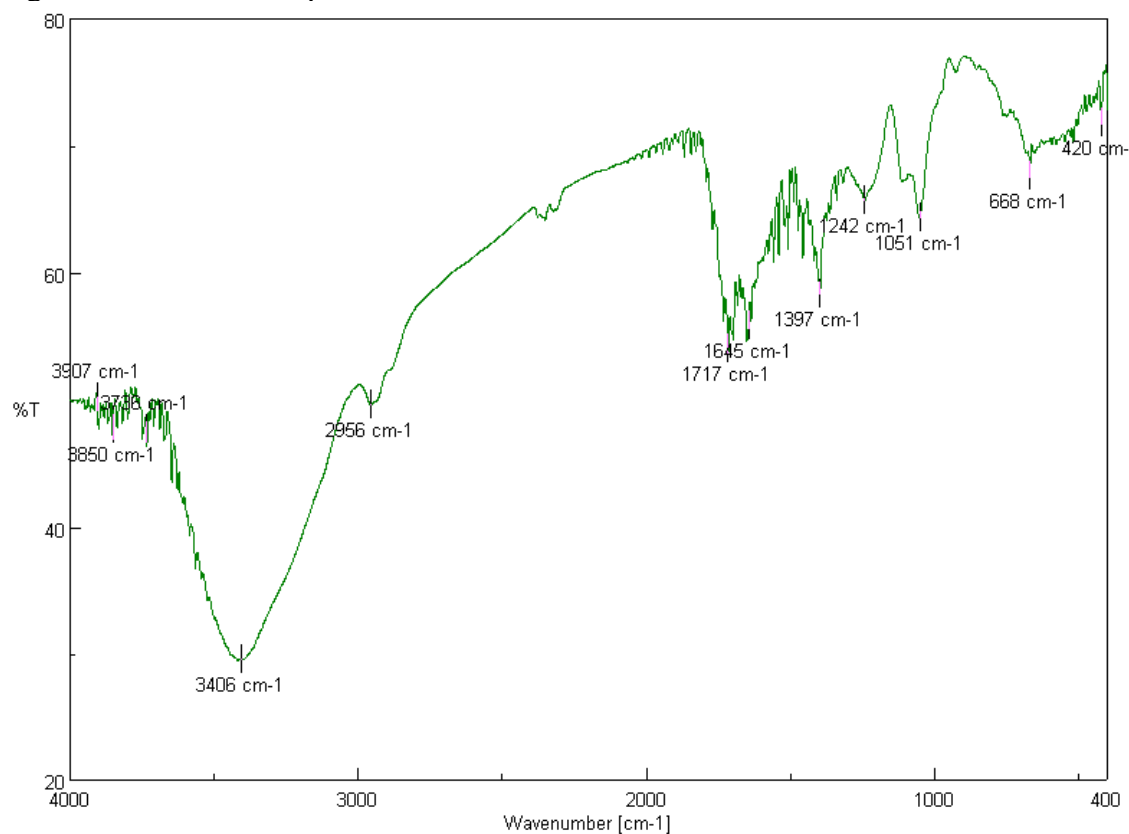

Figure S18: FTIR of Liquid fraction of SC – 600 °C

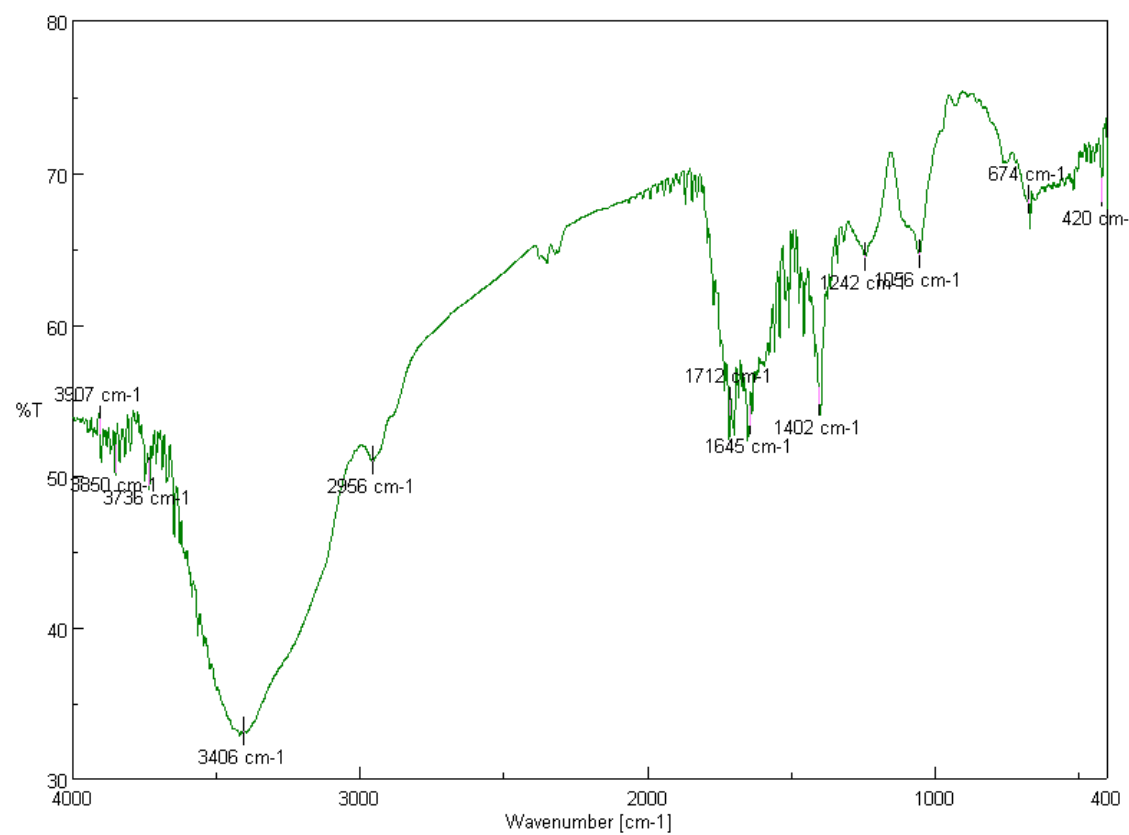

Supplement: s1 [file s1]
